19.11.2020

# Spatio-temporal mRNA dynamics in the early zebrafish embryo

Karoline Holler<sup>1</sup>, Anika Neuschulz<sup>1</sup>, Philipp Drewe-Boß<sup>1</sup>, Janita Mintcheva<sup>1</sup>, Bastiaan Spanjaard<sup>1</sup>, Roberto Arsiè<sup>1</sup>, Uwe Ohler<sup>1,2</sup>, Markus Landthaler<sup>1,3</sup>, Jan Philipp Junker\*<sup>1</sup>

<sup>1</sup>Max Delbrück Center for Molecular Medicine, Berlin Institute for Medical Systems Biology

<sup>2</sup>Department of Biology, Humboldt University, Berlin, Germany

<sup>3</sup>IRI Life Science, Institute of Biology, Humboldt Universität zu Berlin

\* Correspondence: [janphilipp.junker@mdc-berlin.de](mailto:janphilipp.junker@mdc-berlin.de)

## 1 Summary

2 Early stages of embryogenesis depend heavily on subcellular localization and transport of  
3 maternally deposited mRNA. However, systematic analysis of these processes is currently  
4 hindered by a lack of spatio-temporal information in single-cell RNA sequencing. Here,  
5 we combined spatially-resolved transcriptomics and single-cell RNA labeling to study the  
6 spatio-temporal dynamics of the transcriptome during the first few hours of zebrafish devel-  
7 opment. We measured spatial localization of mRNA molecules with sub-single-cell resolu-  
8 tion at the one-cell stage, which allowed us to identify a class of mRNAs that are specifically  
9 localized at an extraembryonic position, the vegetal pole. Furthermore, we established a  
10 method for high-throughput single-cell RNA labeling in early zebrafish embryos, which en-  
11 abled us to follow the fate of individual maternal transcripts until gastrulation. This approach  
12 revealed that many localized transcripts are specifically transported to the primordial germ  
13 cells. Finally, we acquired spatial transcriptomes of two xenopus species, and we compared  
14 evolutionary conservation of localized genes as well as enriched sequence motifs. In sum-  
15 mary, we established sub-single-cell spatial transcriptomics and single-cell RNA labeling to  
16 reveal principles of mRNA localization in early vertebrate development.

## 17 **Keywords**

18 RNA localization, spatially-resolved transcriptomics, RNA labeling, zebrafish, early devel-  
19 opment, gastrulation, maternal factors

## 20 **Introduction**

21 During embryonic development, initially pluripotent cells differentiate into a multitude of  
22 different cell types with distinct gene expression programs and spatial organisation. Ad-  
23 vances in single-cell RNA sequencing (scRNA-seq)<sup>1-4</sup> have made it possible to generate  
24 large single-cell atlases describing complex biological processes, including embryonic de-  
25 velopment of selected organisms. If the number of cells that are sampled is high enough,  
26 even extremely transient, and hence rare, states can be detected. This allows for an or-  
27 dering of cells along an inferred pseudo-temporal trajectory<sup>5-8</sup>. Some of these approaches  
28 have been used successfully to reconstruct the cellular differentiation trajectories that un-  
29 derlie embryonic development in different species<sup>9-12</sup>. However, they fail to give insight into  
30 the earliest stages of embryonic development, which in many species are heavily regulated  
31 by RNA transport and intracellular localization of maternal transcripts<sup>13,14</sup>. In scRNA-seq,  
32 spatial information is lost and transcriptomic changes within a cell are not captured. In ze-  
33 brafish for instance, which develop their body plan and all major organ primordia within 24h  
34 post fertilization (hpf), scRNA-seq does not resolve early patterning events that take place  
35 in the first 4 hours of development<sup>9,10</sup>.

36 While many methods for spatially-resolved transcriptomics have emerged in recent  
37 years<sup>15,16</sup>, state-of-the-art spatial RNA-seq methods typically have not reached the single-  
38 cell level yet<sup>17</sup>. Microscopy-based approaches using sequential fluorescent in situ hy-  
39 bridization hold great promise for spatial transcriptomics with sub-single-cell resolution<sup>18-20</sup>,  
40 but application of these methods to early embryos is technically challenging. Similarly,  
41 methods based on proximity labeling, which are powerful approaches for determining the  
42 transcriptome associated with different cellular compartments, require specific markers,  
43 transgenic engineering and have not been successfully applied to early vertebrate embryos  
44 yet<sup>21,22</sup>.

45 The temporal aspect of RNA expression is, by nature of the experiment, even harder  
46 to catch in single cells. While live microscopy based on fluorescent reporters is well es-  
47 tablished, methods for live measurement of transcript abundance typically consider only a  
48 couple of genes and are difficult to apply in live multicellular animals<sup>23</sup>. However, a cell's  
49 'future transcriptome' can, within certain limits, be inferred from RNA sequencing data by  
50 counting the occurrence of intronic reads<sup>24</sup>. Moreover, recent methods have made consid-  
51 erable progress in directly measuring the transcriptional history of single cells in cell culture

52 by introducing modified nucleotides into newly synthesized RNA<sup>25–29</sup>.

53 In our study, we used a combination of spatially-resolved transcriptomics and RNA la-  
54 beling to study the spatio-temporal dynamics of the transcriptome during the first few hours  
55 of zebrafish development. Specifically, we improved the tomo-seq method<sup>30,31</sup> to measure  
56 RNA localization in one-cell stage zebrafish embryos with high spatial resolution. We used  
57 this information to systematically identify genes with sub-cellular localization patterns. Fur-  
58 thermore, we developed a protocol for single-cell RNA labeling in early zebrafish embryos  
59 that is compatible with high-throughput droplet microfluidics. This approach enabled us to  
60 follow the fate of individual maternal transcripts until gastrulation, and thereby deduce the  
61 biological function of the localized genes in embryonic development. We additionally inves-  
62 tigated mRNA localization in an evolutionarily related system, oocytes from *Xenopus laevis*  
63 and *tropicalis*. This data allowed us to derive principles of mRNA localization in vertebrate  
64 oocytes, as well as evolutionary conservation and enriched sequence motifs.

## 65 Results

66 For a systematic investigation of spatial RNA gradients in the zebrafish one-cell stage em-  
67 bryo, we established an enhanced, more sensitive version of the tomo-seq method<sup>30</sup> (Meth-  
68 ods): We embedded and oriented individual embryos at the one-cell stage (~30 min after  
69 fertilization) along the microscopically visible animal-vegetal axis. We then sectioned the  
70 cell and the yolk sac into 96 sections (Fig. 1a) and followed the tomo-seq protocol (Meth-  
71 ods) for a total of three independent samples. We found that the majority of the mRNA is  
72 located in the blastodisc, which is positioned adherent to the yolk sac at the animal pole of  
73 the embryo (Fig. 1b, Fig. S1). To account for this pattern, we normalized transcript counts  
74 by total UMI counts per section, and recovered known localization patterns, as shown for  
75 important patterning genes like *dazl*, *trim36*, *grip2a*, *wnt8a* and *celf1* (Fig. 1c). Importantly,  
76 we found that our sub-single-cell tomo-seq library has high complexity, which enabled us  
77 to confidently determine spatial expression patterns of a large amount of genes: We found  
78 an average of 13.4 M unique transcripts (UMIs) per sample, and we observed that at the  
79 chosen sequencing depth (61 M reads on average), we are still far from reaching satura-  
80 tion, as determined by comparing UMI counts to read counts (Fig. 1d). Gene expression  
81 of individual replicates correlates well ( $R = 0.99$ , Fig. 1e, Fig. S1).

82 In order to identify gene expression patterns in a systematic way, we clustered our spatial  
83 gene expression data based on a self-organizing map<sup>30,32</sup>, which sorted the cumulative  
84 gene expression traces along a linear axis of 50 profiles (supplementary table 1). As a  
85 result, we found three major groups of localized mRNA (Fig. 2a, S2): one localized to the  
86 animal side in profiles 1 to 8, one group of genes that was more or less equally distributed

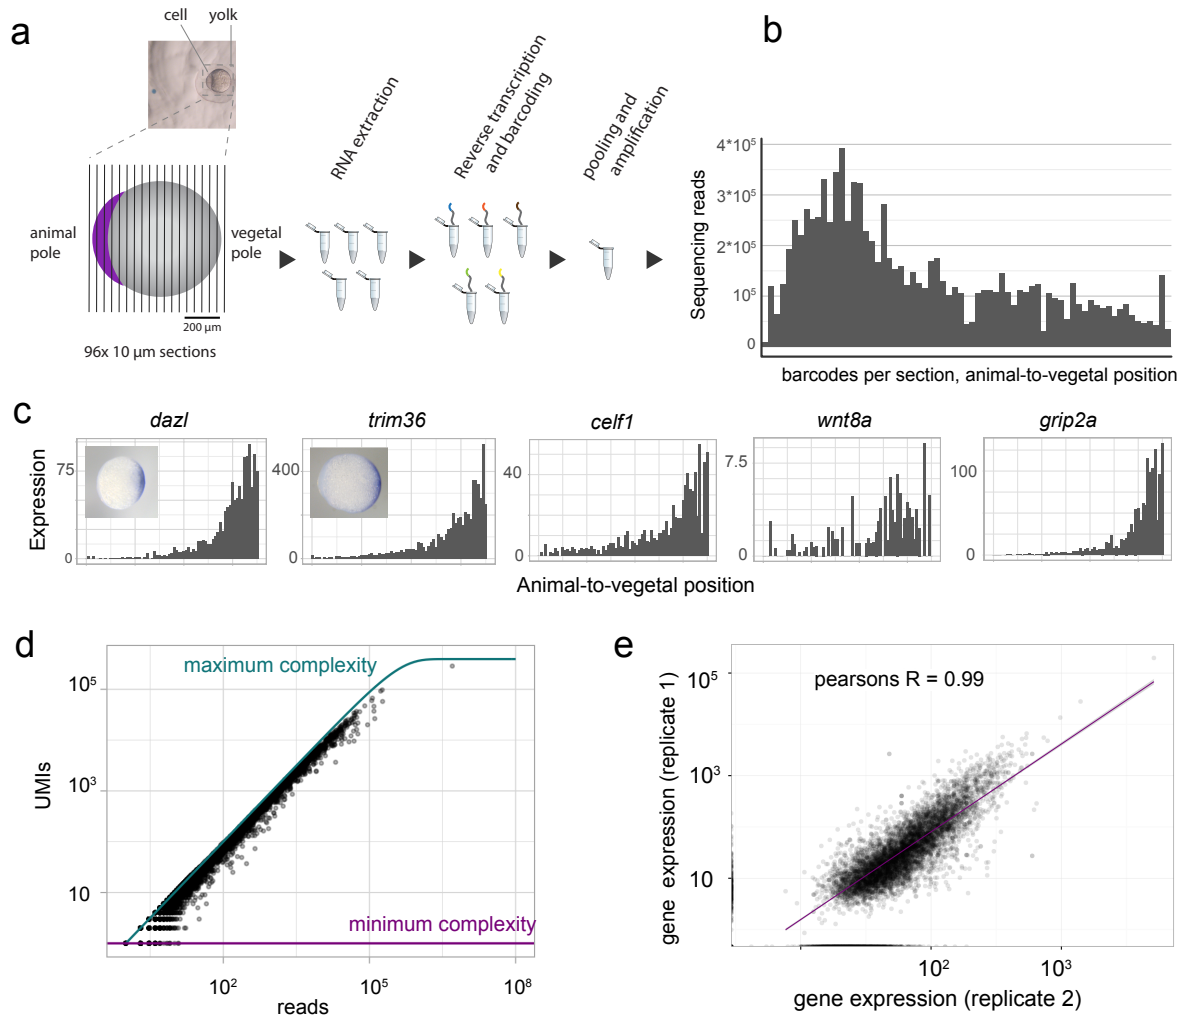

**Figure 1: Low-input tomo-seq robustly recovers spatial mRNA gradients.** a. Experimental outline: The embedded embryo is cryosectioned into 96 slices which are put into separate tubes. After adding spike-in control RNA, RNA is extracted. In a reverse transcription step, spatial barcodes are introduced. Samples are then pooled and amplified by in-vitro transcription and a final library PCR. Scale bars are 200 μm. b. Histogram shows raw transcript counts per section. c. Tomo-seq tracks for the known vegetally localized genes *dazl* and *trim36*, *celf1*, *wnt8a* and *grip2a* and whole-mount in-situ hybridizations (WISH) for *dazl* and *trim36*. d. Sequencing depth, shown as UMI saturation per gene. Maximum saturation is determined as by Grün *et al.*<sup>65</sup>. e. Correlation of two tomo-seq experiments, line is a linear fit to the data.

87 across all sections, and a third group of genes that was localized to the most vegetal part of  
 88 the yolk sac in profiles 48-50. While the first group is likely an overlap between genes that  
 89 had been localized to the animal pole before fertilization and transcripts that are transported  
 90 by non-specific cell-directed cytoplasmic streaming upon fertilization<sup>33</sup>, the third group forms  
 91 a distinct set of transcripts that were specifically transported and retained at the vegetal pole.

92 Since vegetally localized genes have been reported to play major roles in early develop-  
 93 ment, especially in germ cell development and dorso-ventral axis specification<sup>34,35</sup>, and

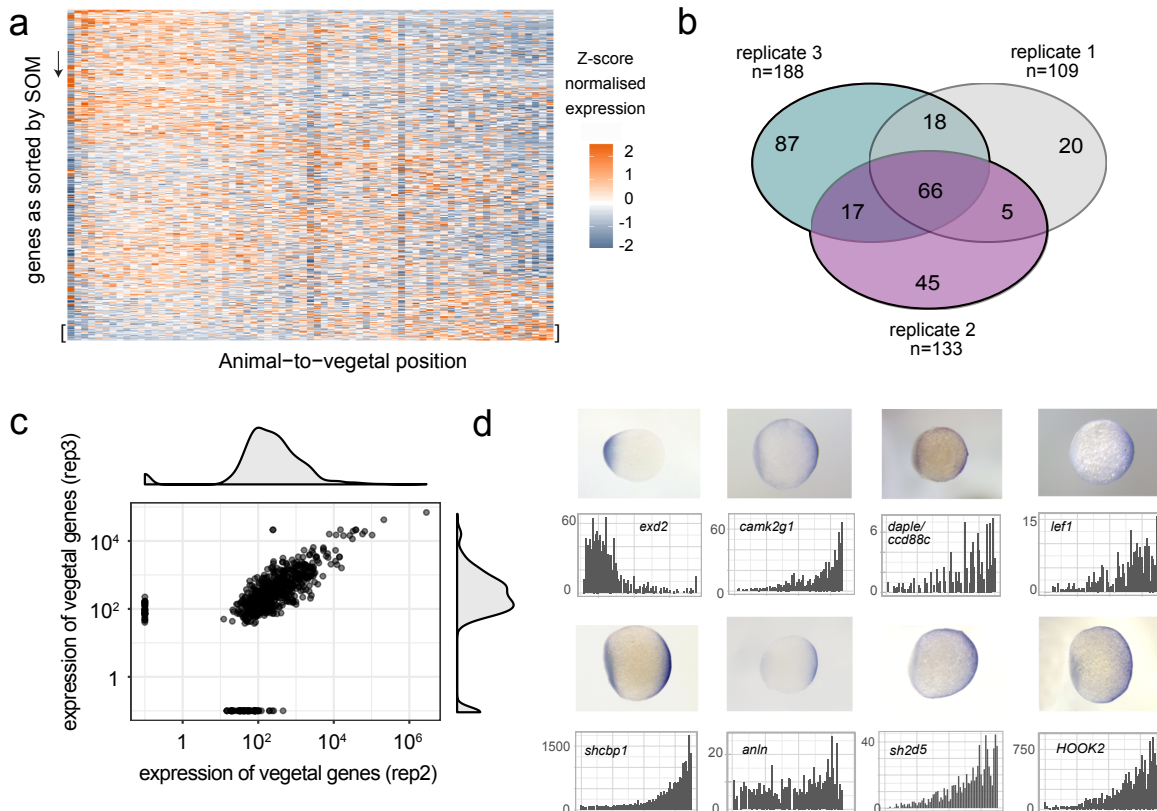

**Figure 2: Tomo-seq of zebrafish one-cell stage embryos allows systematic identification of mRNA localization patterns.** a. Heatmap of z-score normalized expression per section in a zebrafish one-cell stage embryo. Genes on the y-axis as sorted into profiles 1-50 by SOM, spatial position in the embryo on the x-axis. b. Vegetally localized genes per sample (profiles 48-50). c. Correlation of only vegetally localized genes of two replicates. Genes on the axes are only detected in one sample. d. Comparison of tomo-seq and WISH for selected newly described vegetally localized genes as well as the anally localized gene *exd2*.

94 since this group of genes exhibited the most pronounced and reproducible spatial pattern  
 95 in the one-cell stage embryo (Fig. S2), we decided to investigate it in more depth. We  
 96 compared vegetally localized genes in profiles 48-50 between three replicates and found  
 97 an overlap of 66 genes (Fig. 2b). A subset of the localized genes was not detected in one of  
 98 the replicates (Fig. 2c), which was likely due to overall low expression of these genes. An-  
 99 other subset of genes that was defined as vegetally localized in one sample, was detected  
 100 just below the threshold, in profiles 46 and 47, in another replicate (Fig. S2). Since manual  
 101 inspection revealed that these genes had expression traces similar to genes previously an-  
 102 notated as vegetal (examples in Fig. S2), we decided to demand a vegetally localized gene  
 103 to be in profiles 46-50 in all replicates, and in profile 48-50 in at least one of the replicates.  
 104 With these criteria, we defined 97 genes to be localized vegetally, which increases the  
 105 number of known vegetal genes by about tenfold. Moreover, this list includes all genes that

106 to our knowledge have previously been shown to localize vegetally. We validated seven  
107 genes from this list, together with the animally localized gene *exd2*, by whole-mount in situ  
108 hybridization (WISH) (Fig. 2d). In summary, tomo-seq allowed us to determine subcellular  
109 RNA localization in the one-cell stage zebrafish embryo on the transcriptome wide level,  
110 which led to the identification of 97 genes that are specifically localized at the vegetal pole.

111 To better understand the role of the vegetally localized genes in early development,  
112 it is important to follow the fate of maternal transcripts over time, in order to find out to  
113 which cell types they later contribute. The first major embryonic cell type decisions occur at  
114 gastrulation, which in the zebrafish happens at around 6 hpf<sup>36</sup>. Zygotic transcription starts  
115 at around 3 hpf, and gastrulation stages are characterized by a coexistence of maternal  
116 and zygotic transcripts. It is therefore crucial to distinguish maternal transcripts of localized  
117 genes from zygotic expression of the same genes.

118 We hence decided to develop an approach to distinguish maternal and zygotic tran-  
119 scripts transcriptome-wide and on the single cell level. Our method is based on single-cell  
120 RNA metabolic labeling (scSLAM-seq<sup>25,36</sup>), which enables us to distinguish maternal and  
121 zygotic transcripts by incorporation of the nucleotide analog 4-thiouridine (4sU). After a  
122 chemical derivatization step using iodoacetamide (IAA), labeled uridines are detected as  
123 T-to-C mutations upon sequencing<sup>37</sup> (Fig. 3a). Several approaches for RNA labeling in  
124 single cells have been introduced recently<sup>25–29,38</sup>. However, these approaches are limited  
125 to cultured cells and have not been applied to live vertebrate embryos yet. Furthermore,  
126 they are mostly plate-based and (with the exception of Qiu et al.<sup>29</sup>) not compatible with high-  
127 throughput single-cell RNA-seq by droplet microfluidics. In order to study embryonic devel-  
128 opment, and to also capture rare cell types such as germ cells, it was crucial to overcome  
129 these limitations. We therefore developed a scSLAM-seq protocol that does not require cell  
130 lysis prior to IAA derivatization, which allowed us to load intact cells for droplet microfluidics  
131 scRNA-seq (Fig. 3a, Methods). To do so, cell membranes are permeabilized for IAA uptake  
132 by methanol fixation (Fig. S3). Compared to cultured cells, a major challenge in live em-  
133 bryos is to deliver the labeling reagent into the cells. Indeed, we found that addition of 4sU  
134 into the water did not yield high labeling efficiencies (Fig. S3). In bulk experiments, injection  
135 of 4-thiouridine-triphosphate (4sUTP) into one-cell stage zebrafish embryos has been used  
136 successfully for studying maternal-to-zygotic transcription<sup>39</sup>. Using the triphosphate 4sUTP  
137 has the additional advantage that the nucleotide analog is available immediately for incor-  
138 poration into RNA without relying on further metabolic conversion. We observed efficient  
139 RNA labeling and successful conversion with IAA on bulk RNA upon 4sUTP injection (Fig.  
140 S3). We then proceeded to prepare single-cell suspensions at 50% gastrulation, fixed the  
141 cells with methanol and converted 4sUTP to a cytosine analogue in intact cells (Fig. 3a, Fig.  
142 S3). We then sequenced a total of 7472 cells with 10x Genomics Chromium, and analyzed  
143 the data with custom code (see Methods). Comparison of mutation rates in 4sUTP

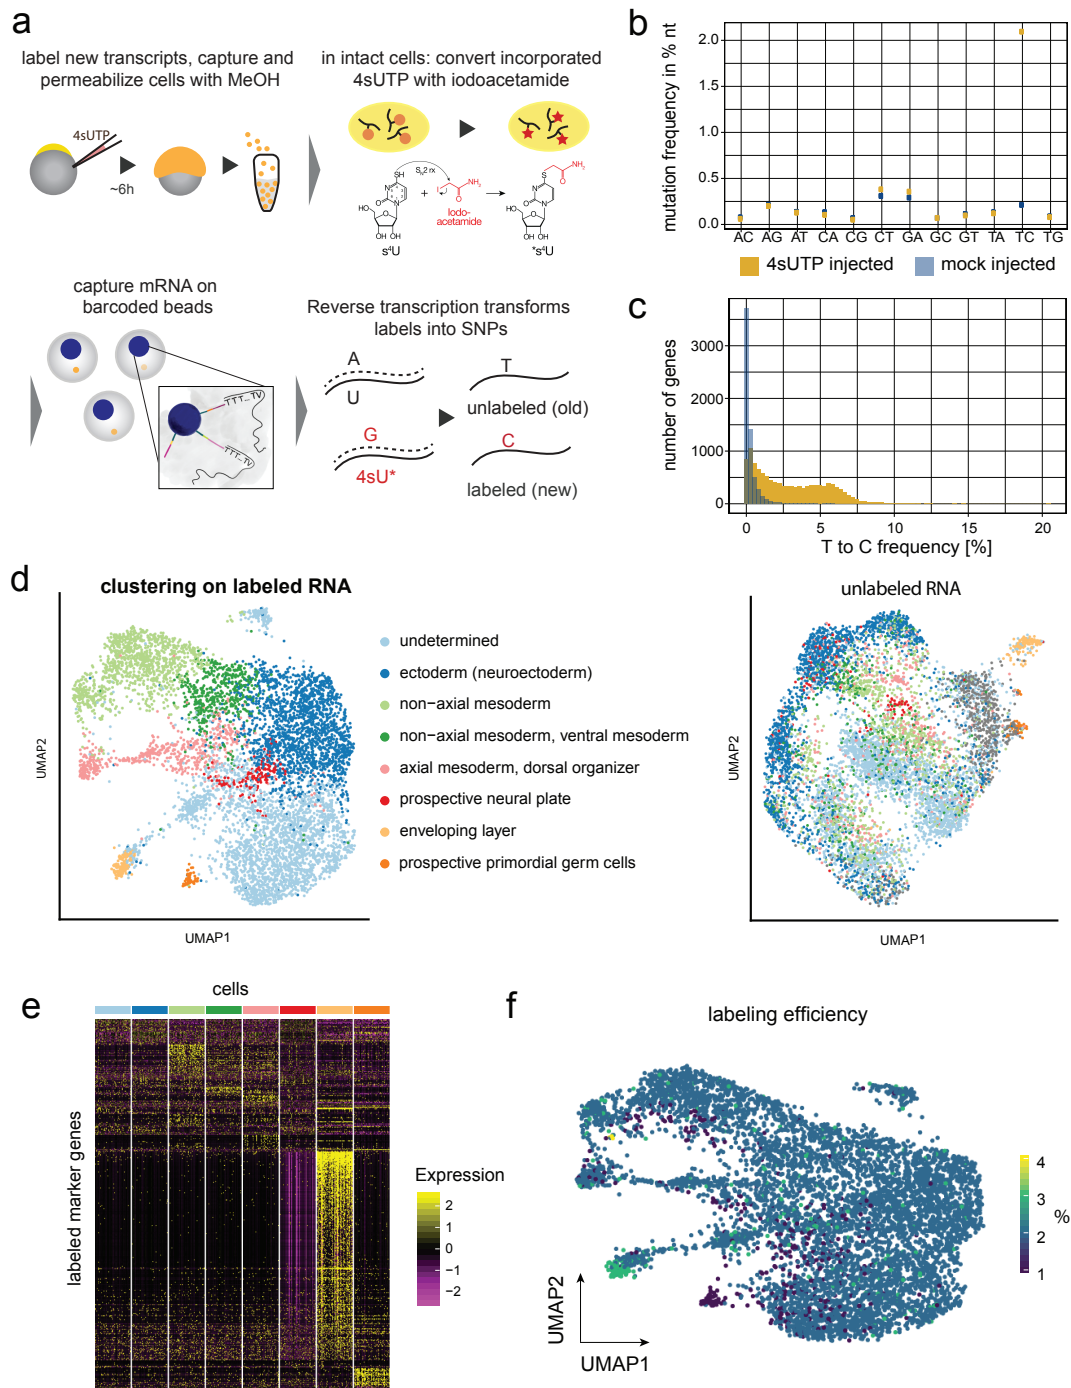

**Figure 3: High-throughput single-cell RNA labeling in early zebrafish embryos.** a. 4sUTP injection into zebrafish one-cell stage embryos, dechorionation, dissociation into single cells at gastrulation stage and methanol fixation (see Methods). Incorporated 4sU is converted in a SN2 reaction with iodoacetamide into a cytosine analogue. Single cell solution is then loaded onto a microfluidic device, chemical labels introduce SNPs during the first reverse transcription. b. Nucleotide mutation frequencies of a scSLAM-seq library after injecting 4sUTP or Tris and quality filtering of the data. c. Histogram of T-to-C mutations in 4sUTP- and Tris-injected embryos. d. UMAP representation of cells based on labeled RNA (left side) and unlabeled RNA (right side). For the latter, we imposed cell identities as determined on the basis of labeled RNA. e. Marker gene expression of labeled cells in different cell types. Cell number per cluster was downsampled to equal numbers. f. Transcript labeling efficiency in single cells in percent, projected on the UMAP representation for labeled RNA.

144 injected embryos with control samples confirmed that the T to C mutation rate is increased  
145 strongly and specifically (Fig. 3b). We found that the 4sUTP treatment resulted in a bi-  
146 modal distribution of the T-to-C mutation frequency per gene (Fig. 3c), suggesting a good  
147 separation of labeled and unlabeled reads. The observed labeling efficiency of 5% cor-  
148 responds to a low false negative rate of ~1% of unlabeled zygotic transcripts (Methods),  
149 which demonstrates that we can reliably distinguish maternal and zygotic transcripts.

150 Unsupervised clustering of cells, using the information of the labeled mRNA, resulted in  
151 eight cell clusters (Fig. 3d) with defined marker gene expression (Fig. 3e, supplementary  
152 table 2). We then clustered cells based on their unlabeled mRNA (Fig. 3d) and imposed cell  
153 identities as defined based on labeled mRNA. As expected, clustering based on unlabeled  
154 (maternal) mRNA separated cell types much less than clustering on labeled (zygotic) RNA,  
155 with the notable exception of the enveloping layer and the primordial germ cells (PGCs).  
156 These two cell types had the most distinct marker gene signature (Fig. 3e, supplementary  
157 table 2), and the cells of the enveloping layer were characterized by a particularly high la-  
158 beling rate (Fig. 3f), which indicates high transcriptional or proliferative activity. The PGCs,  
159 on the other hand, display the lowest labeling rates among all cells at this developmental  
160 stage (Fig. 3f), in agreement with reports that show very slow increase of prospective PGCs  
161 before gastrulation<sup>40,41</sup>.

162 Next, we set out to assess if any of the maternal, vegetally localized genes were over-  
163 represented in specific cell types. At 6 hpf, we still detected unlabeled RNA for 91 of the 97  
164 genes that were localized at the one-cell stage. We filtered out lowly expressed genes, and  
165 for the remaining 47 genes we calculated the expression fold change for each of the cell  
166 types compared to all other cell types (Fig. 4a). We found that the vegetally localized genes  
167 were significantly enriched in PGCs ( $p$ -value =  $4.67 \cdot 10^{-5}$ ), with 28 of them being marker  
168 genes of that particular cluster (supplementary table 3). The logarithmic fold enrichment  
169 of vegetal genes in PGCs follows a bimodal distribution (Fig. 4b, dashed line), suggesting  
170 two subpopulations of vegetal genes. Indeed, we can deconvolve the bimodal distribution  
171 into two normal distributions, where one resembles the distribution of randomly sampled  
172 genes (Fig. 4b light blue and gray), while the other has a significantly higher mean fold  
173 change (Fig. 4b dark blue,  $p$ -value =  $1.7 \cdot 10^{-4}$ ), suggesting a role of these genes in germ  
174 cell specification or development. We show the average expression at 6 hpf for some of  
175 the new candidates (*sh2d5*, *itpkca*, *ndel1b*, *anln*, *krtcap2* and *ppp1r3b*) in Figure 4c, next  
176 to the remaining maternal expression of well-established germ cell factors (Fig. 4d). In-  
177 terestingly, the transcripts of vegetally localized genes with a known role in axis formation  
178 (*wnt8a* and *syntabulin*) cannot be detected any more in the maternal transcriptome, which  
179 suggests that such factors are degraded more rapidly than germ cell factors. In summary,  
180 our scSLAM-seq analysis revealed that a large number of the vegetally localized transcripts  
181 are later transported to primordial germ cells, thereby allowing us to identify a set of novel



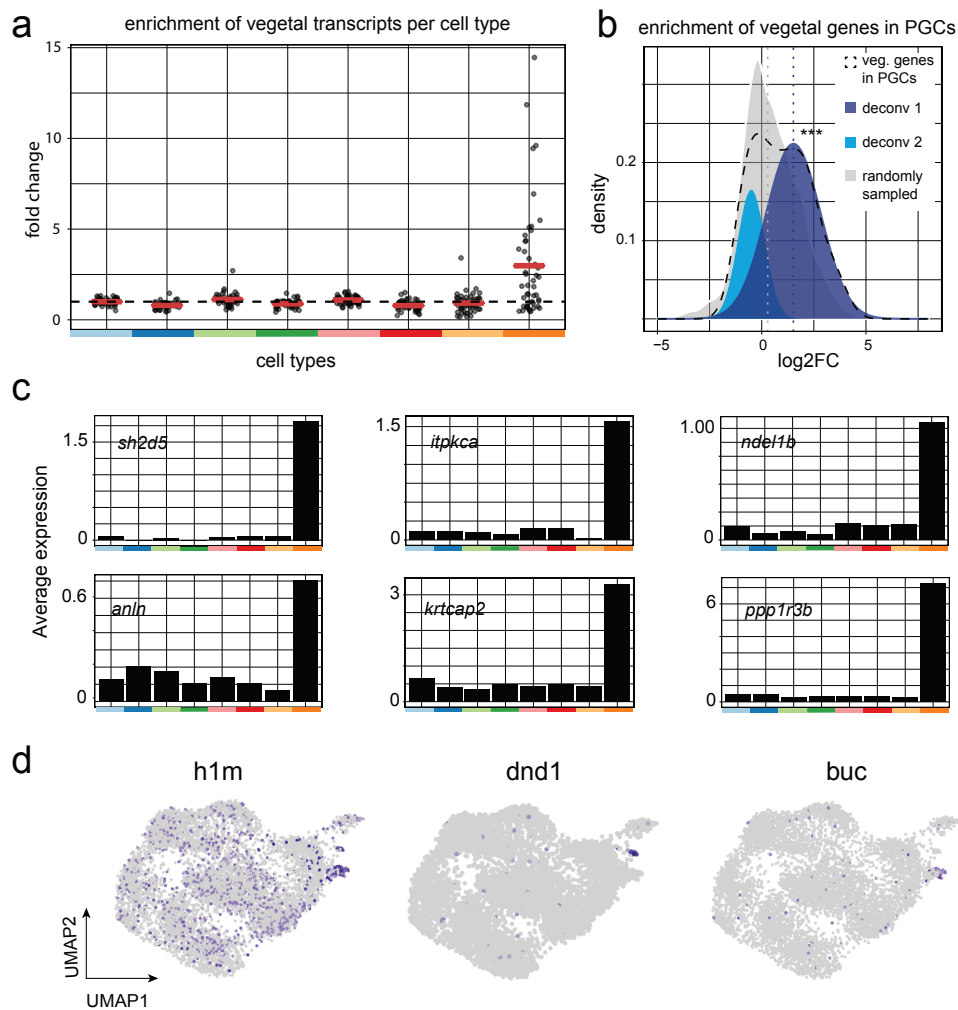

**Figure 4: High-throughput scSLAM-seq follows the fate of maternal transcripts until gastrulation.** a. Fold change enrichment of maternal vegetally localized genes for different cell types vs. all other cells. Genes with an average expression lower than 0.1 were excluded from this analysis. Red bars represent mean values. b. Deconvolution of the bimodal distribution of vegetally localised genes in PGCs (black dashed line) into two normal distributions (light and dark blue). Mean value of dark blue distribution is significantly higher than of a randomly sampled distribution ( $m_{\text{gray}} = 0.4$ ,  $m_{\text{darkblue}} = 1.52$ ,  $p\text{-value} = 1.7 \cdot 10^{-4}$ , Welch's t-test). c. Average expression of most highly enriched genes in PGCs in different cell types. d. Unlabeled RNA expression of established germ cell markers on a UMAP representation.

182 candidate genes with a potential function in germ cell specification and differentiation.

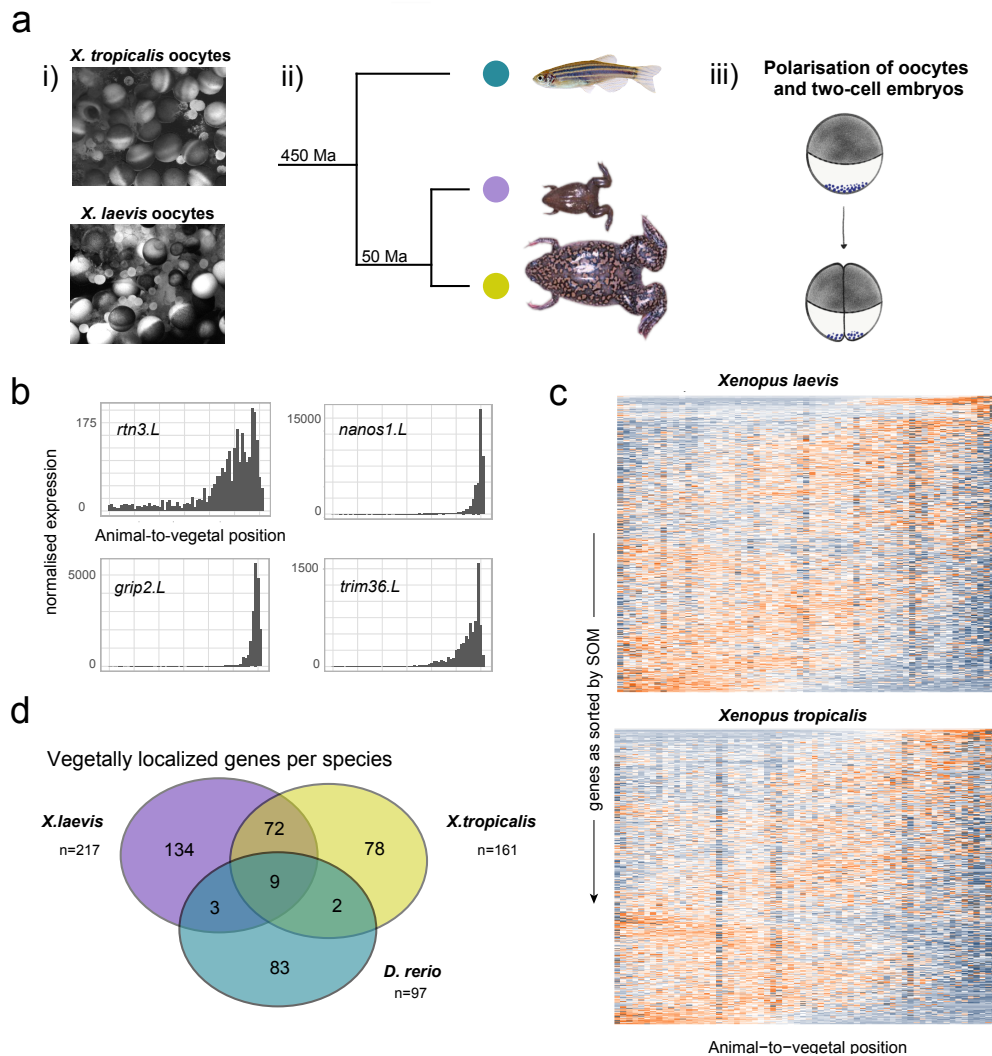

**Figure 5: Evolutionary conservation of mRNA localization between zebrafish and xenopus.** a. i) Light microscopy view of whole oocyte lobes from *X. laevis* and *X. tropicalis* before dissociation. ii) Phylogenetic distance of xenopus species and zebrafish. iii) Deposition of germ plasm and dorsal factors in xenopus oocytes and after first cell division. b. Tomo-seq tracks of vegetally localised genes *rtn3.L*, *nanos1.L*, *grip2.L* and *trim36.L* in *X. laevis*. c. Heatmap of z-score normalized expression per section in xenopus oocytes. Genes on the y-axis as sorted into profiles 1-50 by SOM, spatial position on the x-axis. d. Overlap of vegetally localized genes in zebrafish and xenopus species, considering only genes that were expressed in all three species at the respective developmental stage.

183 We next decided to determine the conservation of germ cell factors by comparing veg-  
 184 etally localized genes in zebrafish and xenopus. Our choice of xenopus was motivated by  
 185 reports showing that 3'UTR sequences of a zebrafish germ plasm gene can drive transcript  
 186 localization in frog oocytes<sup>42</sup>, and furthermore that the localization machineries of two dif-  
 187 ferent xenopus species, *X. tropicalis* and *X. laevis*, are functionally overlapping<sup>42,43</sup>, which

| gene name (zebrafish) | biological function                                                                                   | protein function                   |
|-----------------------|-------------------------------------------------------------------------------------------------------|------------------------------------|
| <i>dazl</i>           | germ plasm component, translational activator                                                         | 3'UTR RNA binding                  |
| <i>sybu</i>           | dorsal/ventral axis specification                                                                     | kinesin binding                    |
| <i>grip2a</i>         | cytoskeleton organization, germ plasm                                                                 | receptor interaction               |
| <i>rfn41</i>          | E3 ubiquitin ligase                                                                                   | RING finger proteins               |
| <i>rnf38</i>          | germ cell development in <i>X.laevis</i> <sup>45</sup>                                                | RING finger proteins               |
| <i>trim36</i>         | regulation of cell cycle                                                                              | RING finger proteins               |
| <i>ppp1r3b</i>        | glycogen metabolism                                                                                   | phosphatase                        |
| <i>ctdsplb</i>        | regulation of RNA Pol II transcription                                                                | phosphatase                        |
| <i>camk2g1</i>        | expressed in gut, nervous system, neural tube, involved in differentiation of inner ear <sup>47</sup> | Ca <sup>2+</sup> -dependent kinase |

**Table 1: Genes with conserved vegetal localization in zebrafish, *X. tropicalis* and *X. laevis*.**

188 suggests that RNA localization is driven by common cis-regulatory elements. Importantly,  
 189 xenopus as well as zebrafish use the vegetal pole to store factors for germ cell specifica-  
 190 tion and dorso-ventral axis determination, which additionally suggests functional similarity  
 191 despite a considerable evolutionary distance (Fig. 5a). Since existing xenopus datasets  
 192 are derived from pooled samples and do not provide a comparable spatial resolution<sup>44–46</sup>,  
 193 we decided to produce tomo-seq datasets of mature oocytes from *X. tropicalis* and *X. lae-*  
 194 *vis*, with two replicates for each species (10  $\mu$ m resolution for *X. tropicalis*, 16 and 18  $\mu$ m  
 195 resolution for *X. laevis*).

196 After excluding lowly expressed genes and normalizing to the same number of tran-  
 197 scripts per section, we recovered known localization patterns for important developmental  
 198 factors (Fig. 5b). As before, we calculated cumulative expression patterns and clustered  
 199 them with self-organizing maps (Fig. 5c, S5, supplementary table 4, 5). In *X. tropicalis*, we  
 200 found 151 genes to be localized animally (1.5%) and 161 to be localized vegetally (1.6%),  
 201 for *X. laevis* we identified 245 genes localized to the animal pole (1.9%) and 216 genes to  
 202 the vegetal pole (1.7%). In accordance with a previous study<sup>44</sup>, the interspecies overlap  
 203 of localized genes was relatively low for these two closely related frog species – 30% for  
 204 animally localized genes and 50% for vegetally localized genes. One important difference  
 205 between high-resolution tomo-seq data and earlier studies of *X. laevis* and *X. tropicalis* is  
 206 the identification of a distinct group of animally localized genes and their corresponding  
 207 motifs (Fig. S5). The existence of animally localized genes was previously controversial,  
 208 since either very few (0.2%, Owens et al.<sup>45</sup>) or a large majority of genes (94.4%, Sindelka  
 209 et al.<sup>46</sup>) were found to be enriched at the animal pole. This highlights the advantages of our  
 210 high-resolution analysis of subcellular RNA localization.

211 While the overlap of the vegetal genes between the two xenopus species with 81 genes

212 was considerable, we only found nine genes to localize vegetally in all three species (Fig.  
213 5d), showing a surprisingly variable transcript composition at the vegetal pole given the  
214 reported high degree of conservation of the localization machinery<sup>42</sup>. However, this anal-  
215 ysis allowed us to propose that these nine genes, including known factors like *dazl* and  
216 *syntabulin*, but also less well characterized genes like *camk2g1* and *ppp1r3b*, have a con-  
217 served function in germ cell development or dorso-ventral axis development. *Camk2g1*, for  
218 instance, was found to be transported to the PGCs in our scSLAM-seq analysis (Fig. 4),  
219 which indicates a conserved role of this gene in germ cell specification. Interestingly, *anln* is  
220 PGC enriched and localized in zebrafish, and it is vegetally localized in *X. tropicalis* but not  
221 in *X. laevis*. The 3'UTR of *X. laevis anln* has a 1 kb long deletion, suggesting a functional  
222 contribution of that sequence to the localization (Fig. S5). Table 1 gives an overview of  
223 the nine genes with conserved localization, their described cellular function (Xenbase.org,  
224 zfin.org) and the protein class of the translated product.

225 Intracellular transcript localization is driven by cis-regulatory localization elements, pre-  
226 sent mainly in 3' untranslated regions (UTRs) of RNA molecules<sup>42,48-51</sup>. However, the exact  
227 nature of the localization motifs in early embryos has largely remained elusive. We therefore  
228 reasoned that our transcriptome-wide datasets of mRNA localization in three species might  
229 now open the door towards a more systematic analysis of these sequence elements. To  
230 this end, we decided to investigate shared sequence features of vegetally localized genes.  
231 Since tomo-seq detects only 3' ends of transcripts, we performed bulk RNA-seq of one-cell  
232 stage zebrafish embryos in order to computationally identify expressed isoforms<sup>52</sup> (Meth-  
233 ods). In total, we detected 216 expressed isoforms of vegetally localized genes in zebrafish.  
234 We found that the 3'UTR sequences of vegetally localizing genes are on average 1.7-fold  
235 longer than for the background ( $p$ -value  $< 2.2 \cdot 10^{-16}$ ) (Fig. 6a). In contrast to this, we found  
236 only moderate differences in length of coding sequences (Fig. 6b) and expression level  
237 (Fig. 6c), and no differences in GC content of 3' UTRs (Fig. S6). Longer 3'UTRs of vege-  
238 tally localized genes could reflect complex cellular regulation of these transcripts in regard  
239 to localization and anchoring to the cytoskeleton, but could also be at least partially related  
240 to other regulatory processes such as translational activity and RNA stability<sup>53</sup>. Finally, we  
241 searched for common cis-regulatory motifs by performing a k-mer enrichment analysis<sup>54</sup>  
242 of the 3'UTRs (Fig. 6d, Methods). We detected variations of a CAC core, several motifs  
243 containing a GUU sequence that has not been described yet, and a poly-U stretch that was  
244 previously linked to increased RNA stability<sup>54,55</sup>.

245 We next performed a k-mer enrichment analysis for the two xenopus species by us-  
246 ing the longest annotated 3'UTR isoform (Fig. 6e, S6). In accordance with previous stu-  
247 dies<sup>48,56,57</sup>, and similar to our results for zebrafish, we found an enrichment of CAC-containing  
248 motifs in vegetally localized genes. Interestingly, we found the same polyU-motif as in ze-  
249 brafish data, suggesting a conserved role in stability of maternal RNA. In *X. tropicalis*, we

250 also found a motif consisting of the same GUU core we identified in zebrafish (Fig. 6d);  
 251 however, the respective local sequence environment differed. In summary, we found a  
 252 relatively high conservation of 3'UTR sequence motifs, which contrasts with the rather low  
 253 conservation of vegetally localized genes that we observed in Figure 5.

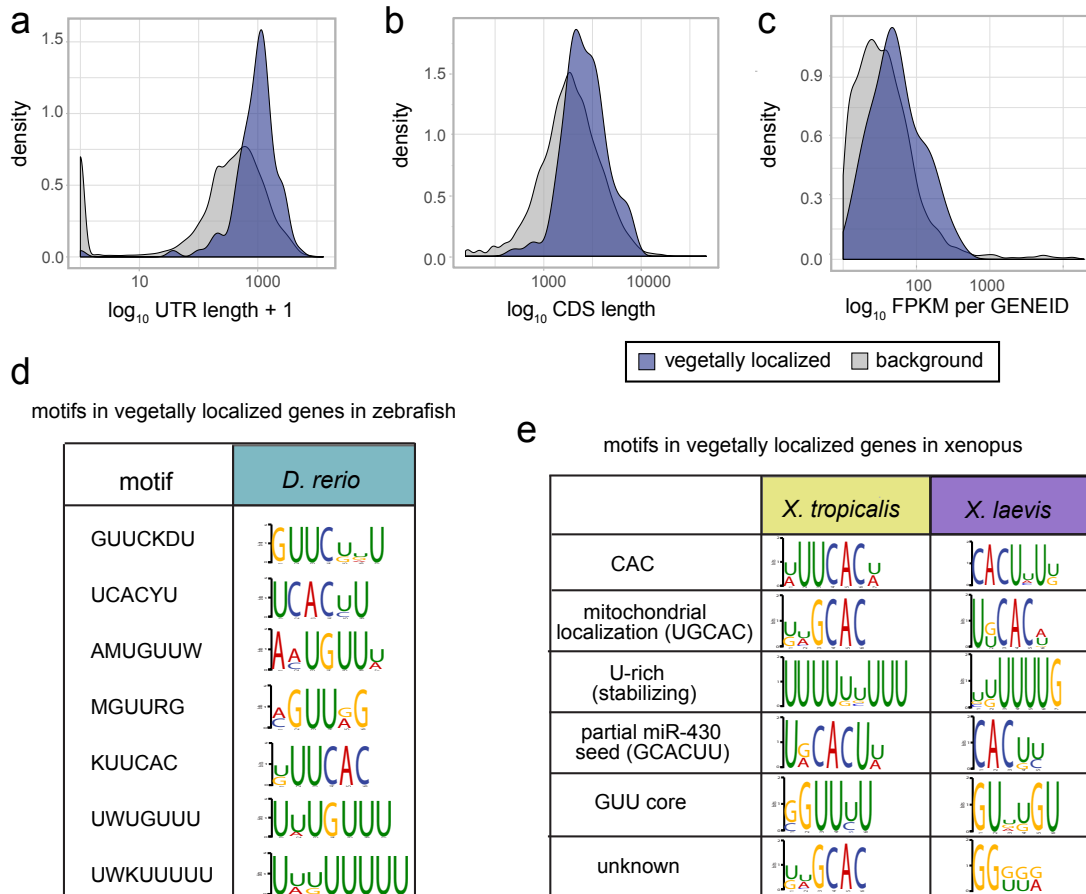

**Figure 6:** 3'UTR characteristics of vegetally localized genes. a-c. Comparison of sequence characteristics of expressed isoforms of vegetally localized to all genes. a. Weighted 3'UTR lengths: Isoforms contribute according to their relative expression, mean(vegetal genes) = 1.06 kb, mean(background) = 0.6 kb, p-value <  $2.2 \cdot 10^{-16}$  (two-sample Wilcoxon test). b. Weighted lengths of coding regions, mean(vegetal genes) = 2.78 kb, mean(background) = 2.42 kb, p-value =  $7.655 \cdot 10^{-14}$  (two-sample Wilcoxon test). c. FPKM sum per gene ID, IDs with less than 10 FPKM were omitted. Mean expression of vegetal genes 64.1 FPKM, mean of background 37.4, p-value <  $2.2 \cdot 10^{-16}$ , (two-sample Wilcoxon test). d. Results of the kmer enrichment analysis of 3'UTRs of 216 expressed isoforms, zebrafish vegetally localized genes. Top seven motifs and logos. e. Results of the kmer enrichment analysis of the longest 3'UTR of vegetally localized genes in *X. laevis* and *X. tropicalis*, top six motifs, and their respective description based on previous publications.

## 254 Discussion

255 We here established improved versions of two methods, the tomo-seq approach for spatially-  
256 resolved transcriptomics, and single-cell SLAM-seq for RNA labeling. In tomo-seq, we  
257 achieved sub-single-cell resolution in zebrafish embryos at the one-cell stage. Importantly,  
258 we observed that the complexity of the tomo-seq libraries was not a limiting factor, suggest-  
259 ing that our approach may be applicable to even smaller samples containing less mRNA.  
260 The tomo-seq method is well suited for spatial transcriptomics in the one-cell stage ze-  
261 brafish embryos, since we expect the most striking patterns along the animal-vegetal axis.  
262 However, in systems with more intricate spatial patterns, different approaches for spatially-  
263 resolved transcriptomics in 2D or 3D may be more suitable.

264 For scSLAM-seq, we achieved two important advances: We made the method compati-  
265 ble with high-throughput scRNA-seq based on widely-used droplet microfluidics approaches  
266 by performing the chemical derivatization of 4sU in intact methanol-fixed cells. Furthermore,  
267 we successfully labeled zygotically transcribed RNA in early zebrafish embryos by injecting  
268 4sUTP into the zygote. scSLAM-seq is a universal approach for following the fate of RNA  
269 molecules over time, and we anticipate that this approach will emerge as a powerful method  
270 for short-term fate tracking of RNA molecules in living organisms. However, it is important  
271 to note that efficient delivery of 4sU into other live animals may require different approaches  
272 depending on the species and the organ system.

273 The combination of sub-single-cell tomo-seq and single-cell RNA labeling generates  
274 important synergy by allowing transcriptome-wide measurement of spatio-temporal RNA  
275 dynamics. We used this combination of techniques for a systems-level analysis of RNA  
276 dynamics in early zebrafish development, which gave us access to developmental events  
277 that are not captured by conventional scRNA-seq. Beyond this specific biological appli-  
278 cation, we anticipate that the combination of spatial transcriptomics and RNA labeling will  
279 find important applications for many other questions, such as tissue remodeling in disease  
280 conditions or analysis of cell-cell signaling interactions in vivo.

281 Besides the methodology presented here, another major output of this work consists in  
282 the transcriptome-wide resource of localized genes in three vertebrate species. While high-  
283 resolution atlases of transcript localization have been established in *Drosophila* oocytes  
284 based on automated microscopy<sup>58</sup>, no comparable datasets exist for early vertebrate de-  
285 velopment, with the exception of low-resolution spatial analysis of *xenopus* oocytes<sup>44–46</sup>.  
286 Our analysis provides a shortlist of candidate genes with a potential role in early develop-  
287 ment, including genes like the phosphatase *ppp1r3b* or the kinase *camk2g1*, which have no  
288 known function in early embryogenesis but are vegetally localized in all three species. We  
289 observed that many vegetally localized transcripts are later specifically transported into the  
290 primordial germ cells, suggesting that specification of the PGCs is one of the main functions

291 of the localized genes discovered here. Interestingly, we observed a relatively low conser-  
292 vation of localized genes, but a rather high conservation of enriched motifs in 3'UTRs. While  
293 it is possible that our analysis underestimates the true degree of conservation of vegetal  
294 localization due to the difficulty of reliably calling localization patterns for lowly expressed  
295 genes, this observation raises the question whether the function of genes involved in e.g.  
296 PGC specification is conserved, even if the localization pattern is not.

297 Asymmetric localization of mRNA molecules is a pervasive phenomenon in the animal  
298 kingdom<sup>59–61</sup> and provides an important layer of gene regulation in a variety of different cell  
299 types by e.g. restricting translation spatially<sup>59,62</sup> or by controlling translation efficiency<sup>60</sup>.  
300 While the exact nature of the localization motifs in early embryos have largely remained  
301 elusive, there are indications that secondary structures<sup>63,64</sup> or sequence-dependent piRNA  
302 adhesion traps might be involved<sup>65</sup>. While our high-resolution spatial transcriptomics data  
303 allowed a systematic analysis of enriched k-mers, the results probably do not reveal the full  
304 mechanism, since we did not identify a single motif that explains localization of all genes.  
305 This, together with the observation that 3'UTRs of vegetally localized genes are longer than  
306 for other genes, suggests more complex and potentially longer regulatory elements than the  
307 k-mers analyzed here. We speculate that the combination of sub-single-cell tomo-seq with  
308 the injection of 3'UTR fragments may in the future provide further insights into the molecular  
309 mechanisms underlying RNA localization.

## 310 **Acknowledgements**

311 The authors thank Jana Richter for her work on whole-mount in-situ hybridizations, Ronny  
312 Schäfer for zebrafish injections, and Nora Fresmann for her kind support with scSLAM-seq  
313 experiments during the Sars-Cov2 lockdown of the laboratory. We thank Moritz Ophaus  
314 who produced *X. laevis* tomo-seq libraries as a rotation student in the lab, and Roberto  
315 Moreno Ayala for support with cell type identification of single cell data. We also acknowl-  
316 edge support by MDC/BIMSB core facilities (zebrafish, genomics, bioinformatics). Work  
317 in J.P.J.'s lab was supported by a European Research Council Starting Grant (ERC-StG  
318 715361 SPACEVAR) and a Helmholtz Incubator grant (Sparse2Big ZT-I-0007).

## 319 **Author contributions**

320 K.H. performed zebrafish tomo-seq experiments and data analysis. Tomo-seq of *X. tropi-*  
321 *calis*, analysis and comparison to *X. laevis* data was done by J.M. as part of her master the-  
322 sis under supervision of K.H. and J.P.J.. Kmer enrichment analysis was done by P.B.. B.S.  
323 built the mapping pipeline, adapted self-organising maps to tomo-seq data and assisted

324 with statistical data analysis. Experimental method development of scSLAM-seq was done  
325 by A.N. and R.A., and A.N. developed the computational pipeline for scSLAM-seq analysis.  
326 Single cell data was jointly analyzed by K.H and A.N., PGC specific and statistical analyses  
327 were performed by K.H. and B.S.. All authors discussed and interpreted the results. The  
328 paper was written by K.H. and J.P.J..

## 329 **Declaration of interests**

330 The authors declare no competing interests.

## 331 **Methods**

### 332 **Animal methods**

#### 333 **Breeding of zebrafish**

334 Fish were maintained according to standard laboratory conditions. All animal procedures  
335 were conducted as approved by the local authorities (LAGeSo, Berlin, Germany). For em-  
336 bryo experiments, we set up group crosses of AB wild type fish.

#### 337 **Preparation of frog oocytes**

338 Oocyte lobes were ordered from the European Xenopus Resource Centre (University of  
339 Portsmouth), manually dissected with forceps on agarose plates, and gently dissociated  
340 with liberase as described by Claussen *et al*<sup>67</sup>.

### 341 **Laboratory methods**

#### 342 **Tomo-seq**

343 Zebrafish embryos were harvested 20 min. after fertilization. Individual embryos were  
344 embedded in OCT medium under a dissection microscope and oriented along the animal-  
345 vegetal axis with tungsten needles. Since the transparency of the embryo makes the em-  
346 bryo invisible after freezing the block, we marked the starting point for the blind collection  
347 of sections with a blue polyacrylamide bead (BIORAD). Before snap-freezing the cryomold  
348 on dry ice, we took a picture to calculate the distance between the edge of the block and  
349 the polyacrylamide bead in Fiji.



350 We sectioned the blocks into 96 sections (thickness 10  $\mu$ m), followed by Trizol RNA  
351 extraction as described in Holler and Junker<sup>31</sup>. Pelleted RNA was directly dissolved in a mix  
352 of dNTPs and barcoded poly-dT primers, and was reverse-transcribed with SuperScript II.  
353 Primer design was inspired by CELseq2 (Hashimshony *et al.*, 2016), using 8 nt barcodes,  
354 6 nt UMIs, and a different adapter design.

355 The following steps include linear amplification with IVT, RNA fragmentation, 2nd reverse  
356 transcription and library PCR; as described in detail previously<sup>31</sup>.

357 For xenopus oocytes we used the same protocol, but adjusted the section thickness  
358 according to the sample diameter.

### 359 **Bulk RNA sequencing**

360 Embryos were harvested 20 minutes after fertilization and directly put into Trizol. We ex-  
361 tracted RNA with chloroform and isopropanol, and dissolved the pelleted RNA in nuclease-  
362 free water. Quality of the RNA was checked on a bioanalyzer RNA pico chip. We then  
363 prepared full length sequencing libraries with the Illumina TruSeq stranded mRNA kit. The  
364 samples were sequenced on Illumina HiSeq4000.

### 365 **WISH**

366 Zebrafish embryos were fixed 20 min. after fertilization in 4% PFA for 2 h. Whole mount *in*  
367 *situ* hybridization was performed as in Thisse *et al*<sup>68</sup>.

### 368 **scSLAM-seq**

#### 369 *4sUTP injections*

370 We injected zebrafish embryos directly after fertilization with 4 nl 4sUTP (12.5 mM, Sigma-  
371 Aldrich, in 10 mM Tris•HCl pH 7.4, Carl Roth). At 50% epiboly we removed the chorions,  
372 then continued incubation until shield stage.

#### 374 *Cell fixation and iodoacetamide treatment*

375 We dissociated 10 shield stage embryos per sample by gently pipetting up and down in  
376 deysolking buffer (55 mM NaCl, 1.8 mM KCl, 1.25 mM NaHCO<sub>3</sub> in HBSS, Life Technolo-  
377 gies). For cell fixation we added cold methanol (Carl Roth) until a final concentration of  
378 80%. We then fixed the cells at -20°C for 30 min. For chemoconversion, we added 1 M  
379 iodoacetamide (Sigma-Aldrich) in 80% methanol and 20% HBSS to a final concentration of  
380 10 mM, and gently agitated the mixture at room temperature, overnight, in the dark.

381

### 382 *Rehydration and preparation for scRNA-seq*

383 To inactivate the iodoacetamide, we spun down the cells at 1,000 g for 5 min and resus-  
384 pended in quenching buffer (DBPS, Gibco, 0.1% BSA, Sigma-Aldrich, 1 U/μl RNaseOUT,  
385 Life Technologies, 100 mM DTT, Carl Roth) and incubated at room temperature for 5 min.  
386 After spinning down again, we resuspended them in DPBS containing 0.01% BSA, 0.5 U/μl  
387 RNaseOUT and 1 mM DTT. The cells were then passed through a 35 μm strainer, counted,  
388 and immediately loaded onto a 10x Chromium system using the 3' kit (V2 and V3).

### 390 *Library preparation and sequencing*

391 We prepared sequencing libraries according to the manufacturer's instructions and se-  
392 quenced them on Illumina HiSeq4000 and NextSeq500 systems.

393  
394 *Dot blots for detection of incorporation and IAA derivatization of 4sUTP* We biotinylated  
395 extracted RNA using the following mixture: 70 ng RNA in 96.8 μl water, 2 μl 1M Tris•HCl  
396 (pH 7.4, Carl Roth), 0.2 μl 0.5M EDTA (Carl Roth), 1 μl 10 mg/ml MTSEA-XX-Biotin (Bi-  
397 otium). The reaction was incubated at room temperature for 30 to 60 min in the dark. We  
398 then separated the biotinylated RNA from the excess biotin by adding the same volume  
399 of Phenol:Chloroform:Isoamylalcohol (Sigma-Aldrich), mixing well and spinning in Phase-  
400 Lock-Gel tubes (Quantabio) at 15,000 g for 5 min. The RNA was then transferred on a Hy-  
401 perbond N+ membrane (Amersham) and UV crosslinked with 2,400 μJ (254nm). To block  
402 nonspecific signal, we incubated the membrane in blocking solution (PBS pH 7.5 (Gibco),  
403 10% SDS (Roti®-Stock 20 % SDS, Carl Roth), 1 mM EDTA) for 30 min. The membrane was  
404 then probed with a 1:5,000 dilution of 1 mg/mL streptavidin-horseradish peroxidase (Pierce)  
405 in blocking solution for 15 min. Finally the membrane was washed six times in PBS con-  
406 taining decreasing concentrations of SDS (10%, 1%, and 0.1% SDS, applied twice each)  
407 for 10 min. The signal of biotin-bound HRP was visualized using Amersham ECL Western  
408 Blotting Detection Reagent (GE Healthcare).

409  
410 Flp-In™ 293 cells (Thermo Fisher) used as a positive and negative control were grown  
411 in DMEM (Gibco) + 10% FBS (Gibco) + 2mM L-Glutamine (Gibco) at 37°C and 5% CO<sub>2</sub>.  
412 The cells were incubated with 300 μM 4sU or mock treated for 15 minutes before we fixed  
413 them in methanol as described above.

## 414 **Quantification and statistical analysis**

### 415 **Mapping of tomo-seq data**

416 Fastq files were mapped with STAR (v2.5.3a) using the `–quantMode` option. Genome ver-  
417 sions used were GRCz11.95 (*D. rerio*), 9.2 (*X. laevis*) and 9.1 (*X. tropicalis*). From the SAM  
418 file, gene counts were assigned to a spatial barcode resulting in a count matrix.

### 419 **Further processing of tomo-seq data**

420 We filtered out sections with a low recovery of ERCC spike-in controls. The cutoff de-  
421 pends on the sequencing depth, and was set as  $\sim 0.04$  percent of the mapped reads of a  
422 library (or 8000 transcripts for the replicate shown in Figure 1). In the remaining sections,  
423 we excluded lowly expressed genes (with less than 5 counts in at least one section, for the  
424 replicate shown in Figure ), then divided gene counts by total counts in that section and nor-  
425 malized to the median section size. For clustering based on *self-organizing maps* (SOM),  
426 we calculated cumulative expression going from low to high section numbers, normalized  
427 the maximum of the cumulative expression to one and let the SOM sort these patterns into a  
428 linear matrix of 1x50 profiles. A gene was called vegetally localized in all replicates when it  
429 was assigned any profile between 46 and 50 in all replicates and at least 48 in one replicate.

### 430 **Isoform analysis and kmer enrichment**

431 Isoform expression in zebrafish one-cell stage embryos was determined using cufflinks  
432 v2.2.1. For kmer enrichment, we extracted 3' UTR sequences as annotated in the ze-  
433 brafish genome version GRCz10. Next, we compared vegetally localized to all expressed  
434 genes with DREME (v4.11.2) using the parameters: `-g 1000 -norc -e 0.5 -mink 3 -maxk 10`.  
435 For xenopus, we used the longest annotated 3'UTR for our analysis.

436 We calculated the 3'UTR length of a gene ID as shown in Fig. 2a by weighing the  
437 isoforms 3'UTR length according to their relative contribution to a gene IDs total expression.  
438 CDS length as shown in Fig. 2c were calculated accordingly.

### 439 **Alignment of UTRs from *D. rerio*, *X. laevis* and *X. tropicalis***

440 UTR sequences were aligned using the mafft online tool (<http://mafft.cbrb.jp/alignment/server/>)  
441 using the following parameters: `%mafft –reorder –anysymbol –maxiterate 1000 –retree 1`  
442 `–genafpair input`

## 443 **scSLAM-seq mapping and analysis**

444 Raw data was demultiplexed with cellranger mkfastq (v3.0.2), and mapped with the default  
445 parameters of cellranger (10x Genomics) to the zebrafish genome, version GRCz11.95. We  
446 used the inbuilt cell detection algorithm to create a 'whitelist' with all barcodes that contain  
447 cells and extracted these barcodes from the BAM file to only consist of reads from real cells.  
448 We further separated the reads in that file into labeled reads ( $> 1$  T to C mutation per UMI,  
449 base quality  $> 20$ ) and unlabeled reads. We then created a fastq file for labeled and for  
450 unlabeled reads, respectively, mapped them with STARsolo and obtained count matrices  
451 that were further analysed with Seurat v.3.1.2.

## 452 **Calculation of false negative rate in scSLAM-seq**

453 We estimated the false negative rate (i.e. the probability of a zygotic transcript molecule  
454 to remain unlabeled) with the following back-of-the-envelope calculation: We expect that  
455 approximately 5% of all Us are labeled in a zygotic transcript (Fig. 3c). The read length  
456 was 99 nt. Since the library was sequenced with  $\sim 4$  reads per UMI, we assume an effective  
457 read length of 300 nt, taking into account that different reads for the same UMI may partially  
458 overlap. The GC content is on average 40%, which results in 30% Us, and hence 90 Us  
459 per transcript molecule. The probability that a zygotic transcript does not contain a single  
460 labelled U is therefore  $0.95^{90} \approx 1\%$ .

## 461 **Supplementary tables:**

462 Supplementary Table 1: Expressed zebrafish genes and SOM profiles for three replicates  
463 Supplementary Table 2: Marker genes for cell identities, based on labeled RNA, zebrafish,  
464 6 hpf  
465 Supplementary Table 3: Marker genes for cell identities, based on unlabeled RNA, ze-  
466 brafish, 6 hpf  
467 Supplementary Table 4: Expressed genes in *X. laevis* and SOM profiles for two replicates  
468 Supplementary Table 5: Expressed genes in *X. tropicalis* and SOM profiles for two repli-  
469 cates

470

## 471 **References**

472 1. Hashimshony, T. et al. CEL-Seq2: sensitive highly-multiplexed single-cell RNA-Seq.  
473 *Genome Biol.* **17**, 77 (2016).

- 474 2. Islam, S. et al. Quantitative single-cell RNA-seq with unique molecular identifiers.  
475 *Nat. Methods* **11**, 163–166 (2014).
- 476 3. Klein, A. M. et al. Droplet barcoding for single-cell transcriptomics applied to embry-  
477 onic stem cells. *Cell* **161**, 1187–1201 (2015).
- 478 4. Macosko, E. Z. et al. Highly Parallel Genome-wide Expression Profiling of Individual  
479 Cells Using Nanoliter Droplets. *Cell* **161**, 1202–1214 (2015).
- 480 5. Haghverdi, L., Büttner, M., Wolf, F. A., Buettner, F. & Theis, F. J. Diffusion pseudotime  
481 robustly reconstructs lineage branching. *Nat. Methods* **13**, 845–848 (2016).
- 482 6. Kester, L. & van Oudenaarden, A. Single-Cell Transcriptomics Meets Lineage Tracing.  
483 *Cell Stem Cell* vol. 23 166–179 (2018).
- 484 7. Setty, M. et al. Wishbone identifies bifurcating developmental trajectories from single-  
485 cell data. *Nature Biotechnology* vol. 34 637–645 (2016).
- 486 8. Trapnell, C. et al. The dynamics and regulators of cell fate decisions are revealed by  
487 pseudotemporal ordering of single cells. *Nat. Biotechnol.* **32**, 381–386 (2014).
- 488 9. Wagner, D. E. et al. Single-cell mapping of gene expression landscapes and lineage  
489 in the zebrafish embryo. *Science* **360**, 981–987 (2018).
- 490 10. Farrell, J. A. et al. Single-cell reconstruction of developmental trajectories during ze-  
491 brafish embryogenesis. *Science* **360**, (2018).
- 492 11. Cao, J. et al. The single-cell transcriptional landscape of mammalian organogenesis.  
493 *Nature* **566**, 496–502 (2019).
- 494 12. Plass, M. et al. Cell type atlas and lineage tree of a whole complex animal by single-  
495 cell transcriptomics. *Science* 360, (2018).
- 496 13. Escobar-Aguirre, M., Elkouby, Y. M. & Mullins, M. C. Localization in Oogenesis of  
497 Maternal Regulators of Embryonic Development. *Advances in Experimental Medicine  
498 and Biology* 173–207 (2017) doi:10.1007/978-3-319-46095-6\_5.
- 499 14. Elkouby, Y. M. & Mullins, M. C. Coordination of cellular differentiation, polarity, mitosis  
500 and meiosis – New findings from early vertebrate oogenesis. *Developmental Biology*  
501 vol. 430 275–287 (2017).
- 502 15. Lein, E., Borm, L. E. & Linnarsson, S. The promise of spatial transcriptomics for neu-  
503 roscience in the era of molecular cell typing. *Science* **358**, 64–69 (2017).

- 504 16. Moor, A. E. & Itzkovitz, S. Spatial transcriptomics: paving the way for tissue-level  
505 systems biology. *Curr. Opin. Biotechnol.* **46**, 126–133 (2017).
- 506 17. Rodrigues, S. G. et al. Slide-seq: A scalable technology for measuring genome-wide  
507 expression at high spatial resolution. *Science* **363**, 1463–1467 (2019).
- 508 18. Eng, C.-H. L. et al. Transcriptome-scale super-resolved imaging in tissues by RNA  
509 seqFISH. *Nature* **568**, 235–239 (2019).
- 510 19. Xia, C., Fan, J., Emanuel, G., Hao, J. & Zhuang, X. Spatial transcriptome profiling by  
511 MERFISH reveals subcellular RNA compartmentalization and cell cycle-dependent  
512 gene expression. *Proc. Natl. Acad. Sci. U. S. A.* **116**, 19490–19499 (2019).
- 513 20. Codeluppi, S. et al. Spatial organization of the somatosensory cortex revealed by  
514 osmFISH. *Nat. Methods* **15**, 932–935 (2018).
- 515 21. Padrón, A., Iwasaki, S. & Ingolia, N. T. Proximity RNA Labeling by APEX-Seq Reveals  
516 the Organization of Translation Initiation Complexes and Repressive RNA Granules.  
517 *Mol. Cell* **75**, 875–887.e5 (2019).
- 518 22. Fazal, F. M. et al. Atlas of Subcellular RNA Localization Revealed by APEX-Seq. *Cell*  
519 **178**, 473–490.e26 (2019).
- 520 23. Coleman, R. A. et al. Imaging Transcription: Past, Present, and Future. *Cold Spring*  
521 *Harb. Symp. Quant. Biol.* **80**, 1–8 (2015).
- 522 24. La Manno, G. et al. RNA velocity of single cells. *Nature* **560**, 494–498 (2018).
- 523 25. Erhard, F. et al. scSLAM-seq reveals core features of transcription dynamics in single  
524 cells. *Nature* **571**, 419–423 (2019).
- 525 26. Hendriks, G.-J. et al. NASC-seq monitors RNA synthesis in single cells. *Nat. Com-*  
526 *mun.* **10**, 3138 (2019).
- 527 27. Battich, N. et al. Sequencing metabolically labeled transcripts in single cells reveals  
528 mRNA turnover strategies. *Science* **367**, 1151–1156 (2020).
- 529 28. Cao, J., Zhou, W., Steemers, F. et al. Sci-fate characterizes the dynamics of gene  
530 expression in single cells. *Nat Biotechnol* **38**, 980–988 (2020).
- 531 29. Qiu, Q. et al. Massively parallel and time-resolved RNA sequencing in single cells  
532 with scNT-seq. *Nat. Methods* **17**, 991–1001 (2020).
- 533 30. Junker, J. P. et al. Genome-wide RNA Tomography in the zebrafish embryo. *Cell* **159**,  
534 662–675 (2014).

- 535 31. Holler, K. & Junker, J. P. RNA Tomography for Spatially Resolved Transcriptomics  
536 (Tomo-Seq). *Methods Mol. Biol.* **1920**, 129–141 (2019).
- 537 32. Kohonen, T. Self-organized formation of topologically correct feature maps. *Biological*  
538 *Cybernetics* vol. 43 59–69 (1982).
- 539 33. Kimmel, C. B., Ballard, W. W., Kimmel, S. R., Ullmann, B. & Schilling, T. F. Stages of  
540 embryonic development of the zebrafish. *Dev. Dyn.* **203**, 253–310 (1995).
- 541 34. Langdon, Y. G. & Mullins, M. C. Maternal and zygotic control of zebrafish dorsoventral  
542 axial patterning. *Annu. Rev. Genet.* **45**, 357–377 (2011).
- 543 35. Welch, E. & Pelegri, F. Cortical depth and differential transport of vegetally localized  
544 dorsal and germ line determinants in the zebrafish embryo. *Bioarchitecture* **5**, 13–26  
545 (2014).
- 546 36. Schier, A. F. & Talbot, W. S. Molecular genetics of axis formation in zebrafish. *Annu.*  
547 *Rev. Genet.* **39**, 561–613 (2005).
- 548 37. Herzog, V. A. et al. Thiol-linked alkylation of RNA to assess expression dynamics.  
549 *Nat. Methods* **14**, 1198–1204 (2017).
- 550 38. Cao, J., Zhou, W., Steemers, F., Trapnell, C. & Shendure, J. Sci-fate characterizes the  
551 dynamics of gene expression in single cells. *Nat. Biotechnol.* **38**, 980–988 (2020).
- 552 39. Heyn, P. et al. The earliest transcribed zygotic genes are short, newly evolved, and  
553 different across species. *Cell Rep.* **6**, 285–292 (2014).
- 554 40. Yoon, C., Kawakami, K. & Hopkins, N. Zebrafish vasa homologue RNA is localized to  
555 the cleavage planes of 2- and 4-cell-stage embryos and is expressed in the primordial  
556 germ cells. *Development* **124**, 3157–3165 (1997).
- 557 41. Raz, E. Primordial germ-cell development: the zebrafish perspective. *Nat. Rev.*  
558 *Genet.* **4**, 690–700 (2003).
- 559 42. Knaut, H., Steinbeisser, H., Schwarz, H. & Nüsslein-Volhard, C. An evolutionary con-  
560 served region in the vasa 3'UTR targets RNA translation to the germ cells in the ze-  
561 brafish. *Curr. Biol.* **12**, 454–466 (2002).
- 562 43. Claussen, M., Horvay, K. & Pieler, T. Evidence for overlapping, but not identical, pro-  
563 tein machineries operating in vegetal RNA localization along early and late pathways  
564 in *Xenopus* oocytes. *Development* **131**, 4263–4273 (2004).

- 565 44. Claußen, M. et al. Global analysis of asymmetric RNA enrichment in oocytes reveals  
566 low conservation between closely related *Xenopus* species. *Mol. Biol. Cell* **26**, 3777–  
567 3787 (2015).
- 568 45. Owens, D. A. et al. High-throughput analysis reveals novel maternal germline RNAs  
569 crucial for primordial germ cell preservation and proper migration. *Development* **144**,  
570 292–304 (2017).
- 571 46. Sindelka, R. et al. Asymmetric distribution of biomolecules of maternal origin in the  
572 *Xenopus laevis* egg and their impact on the developmental plan. *Sci. Rep.* **8**, 8315  
573 (2018).
- 574 47. Rothschild, S. C. et al. CaMK-II activation is essential for zebrafish inner ear devel-  
575 opment and acts through Delta-Notch signaling. *Dev. Biol.* **381**, 179–188 (2013).
- 576 48. Betley, J. N., Frith, M. C., Graber, J. H., Choo, S. & Deshler, J. O. A ubiquitous and  
577 conserved signal for RNA localization in chordates. *Curr. Biol.* **12**, 1756–1761 (2002).
- 578 49. Jambhekar, A. & Derisi, J. L. Cis-acting determinants of asymmetric, cytoplasmic RNA  
579 transport. *RNA* **13**, 625–642 (2007).
- 580 50. Kosaka, K., Kawakami, K., Sakamoto, H. & Inoue, K. Spatiotemporal localization of  
581 germ plasm RNAs during zebrafish oogenesis. *Mech. Dev.* **124**, 279–289 (2007).
- 582 51. Taliaferro, J. M. et al. Distal Alternative Last Exons Localize mRNAs to Neural Pro-  
583 jections. *Mol. Cell* **61**, 821–833 (2016).
- 584 52. Trapnell, C. et al. Transcript assembly and quantification by RNA-Seq reveals unan-  
585 notated transcripts and isoform switching during cell differentiation. *Nat. Biotechnol.*  
586 **28**, 511–515 (2010).
- 587 53. Yartseva, V., Takacs, C. M., Vejnar, C. E., Lee, M. T. & Giraldez, A. J. RESA identifies  
588 mRNA-regulatory sequences at high resolution. *Nat. Methods* **14**, 201–207 (2017).
- 589 54. Bailey, T. L. DREME: motif discovery in transcription factor ChIP-seq data. *Bioinfor-*  
590 *matics* **27**, 1653–1659 (2011).
- 591 55. Rabani, M., Pieper, L., Chew, G.-L. & Schier, A. F. A Massively Parallel Reporter  
592 Assay of 3' UTR Sequences Identifies In Vivo Rules for mRNA Degradation. *Mol.*  
593 *Cell* **68**, 1083–1094.e5 (2017).
- 594 56. Chang, P. et al. Localization of RNAs to the mitochondrial cloud in *Xenopus* oocytes  
595 through entrapment and association with endoplasmic reticulum. *Mol. Biol. Cell* **15**,  
596 4669–4681 (2004).



- 597 57. King, M. L., Messitt, T. J. & Mowry, K. L. Putting RNAs in the right place at the right  
598 time: RNA localization in the frog oocyte. *Biol. Cell* **97**, 19–33 (2005).
- 599 58. Jambor, H. et al. Systematic imaging reveals features and changing localization of  
600 mRNAs in Drosophila development. *Elife* **4**, (2015).
- 601 59. Lécuyer, E. et al. Global analysis of mRNA localization reveals a prominent role in  
602 organizing cellular architecture and function. *Cell* **131**, 174–187 (2007).
- 603 60. Moor, A. E. et al. Global mRNA polarization regulates translation efficiency in the  
604 intestinal epithelium. *Science* **357**, 1299–1303 (2017).
- 605 61. Ciolli Mattioli, C. et al. Alternative 3' UTRs direct localization of functionally diverse  
606 protein isoforms in neuronal compartments. *Nucleic Acids Research* vol. 47 2560–  
607 2573 (2019).
- 608 62. Zappulo, A. et al. RNA localization is a key determinant of neurite-enriched proteome.  
609 *Nat. Commun.* **8**, 583 (2017).
- 610 63. Rabani, M., Kertesz, M. & Segal, E. Computational prediction of RNA structural motifs  
611 involved in posttranscriptional regulatory processes. *Proc. Natl. Acad. Sci. U. S. A.*  
612 **105**, 14885–14890 (2008).
- 613 64. Martin, K. C. & Ephrussi, A. mRNA localization: gene expression in the spatial dimen-  
614 sion. *Cell* **136**, 719–730 (2009).
- 615 65. Vourekas, A., Alexiou, P., Vrettos, N., Maragkakis, M. & Mourelatos, Z. Sequence-  
616 dependent but not sequence-specific piRNA adhesion traps mRNAs to the germ plasm.  
617 *Nature* **531**, 390–394 (2016).
- 618 66. Grün, D., Kester, L. & van Oudenaarden, A. Validation of noise models for single-cell  
619 transcriptomics. *Nat. Methods* **11**, 637–640 (2014).
- 620 67. Claussen, M. & Pieler, T. Identification of vegetal RNA-localization elements in Xeno-  
621 pus oocytes. *Methods* **51**, 146–151 (2010).
- 622 68. Thisse, C. & Thisse, B. High-resolution in situ hybridization to whole-mount zebrafish  
623 embryos. *Nat. Protoc.* **3**, 59–69 (2008).
